# Supplementary material
Source: HighWire-hosted journal article supplement (https://bmjopen.bmj.com/content/14/3/e073913)
Supplement: inline-supplementary-material-3 [file inline-supplementary-material-3.pdf]

1    **Appendix 1 through 5:** Residuals and auto-correlation functions for outcomes

2    **Appendix 1:** Case-mix index (CMI) mean

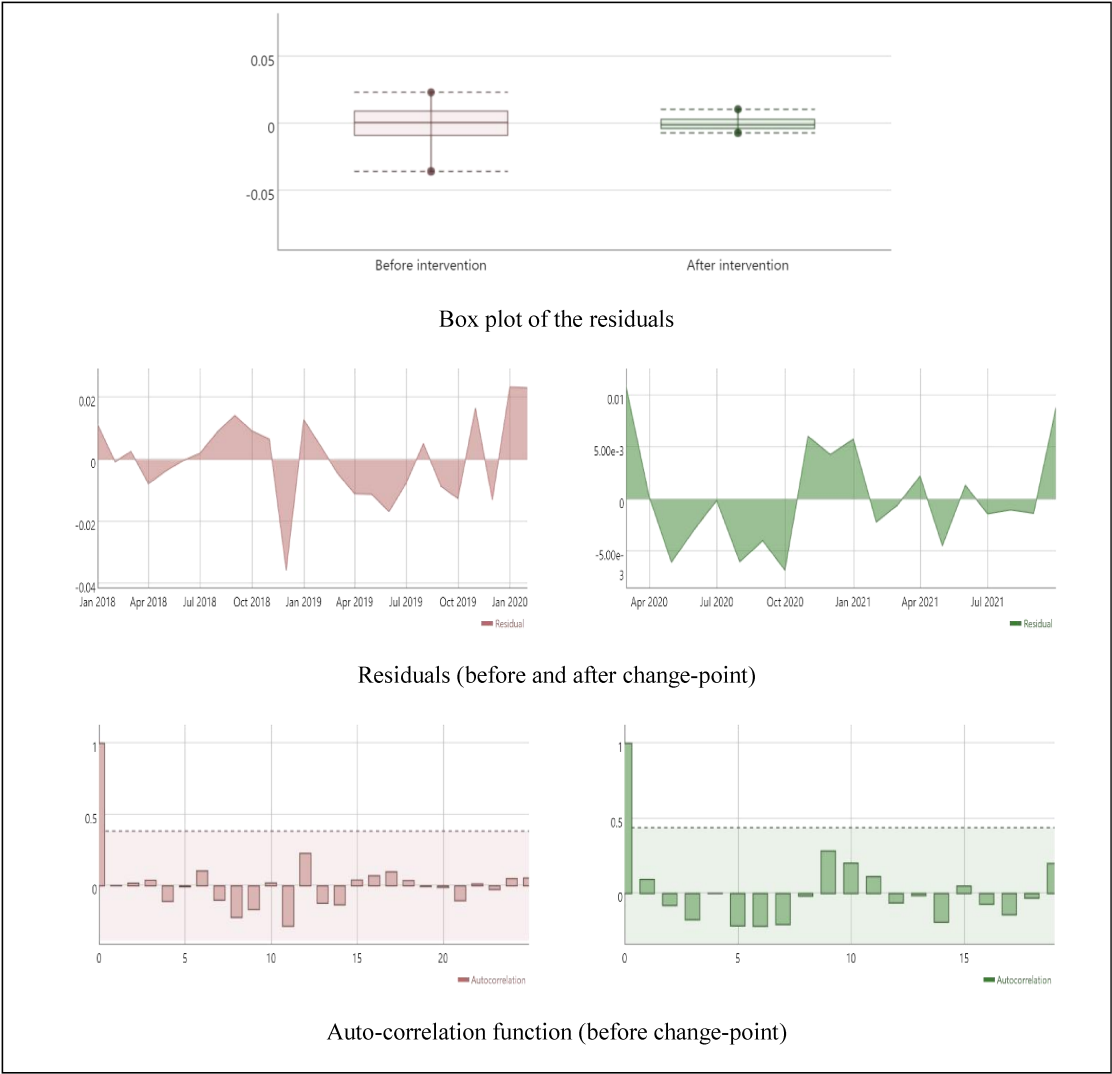

3    **Plots 1:** CMI mean in total institutions

4

5

6

7

8

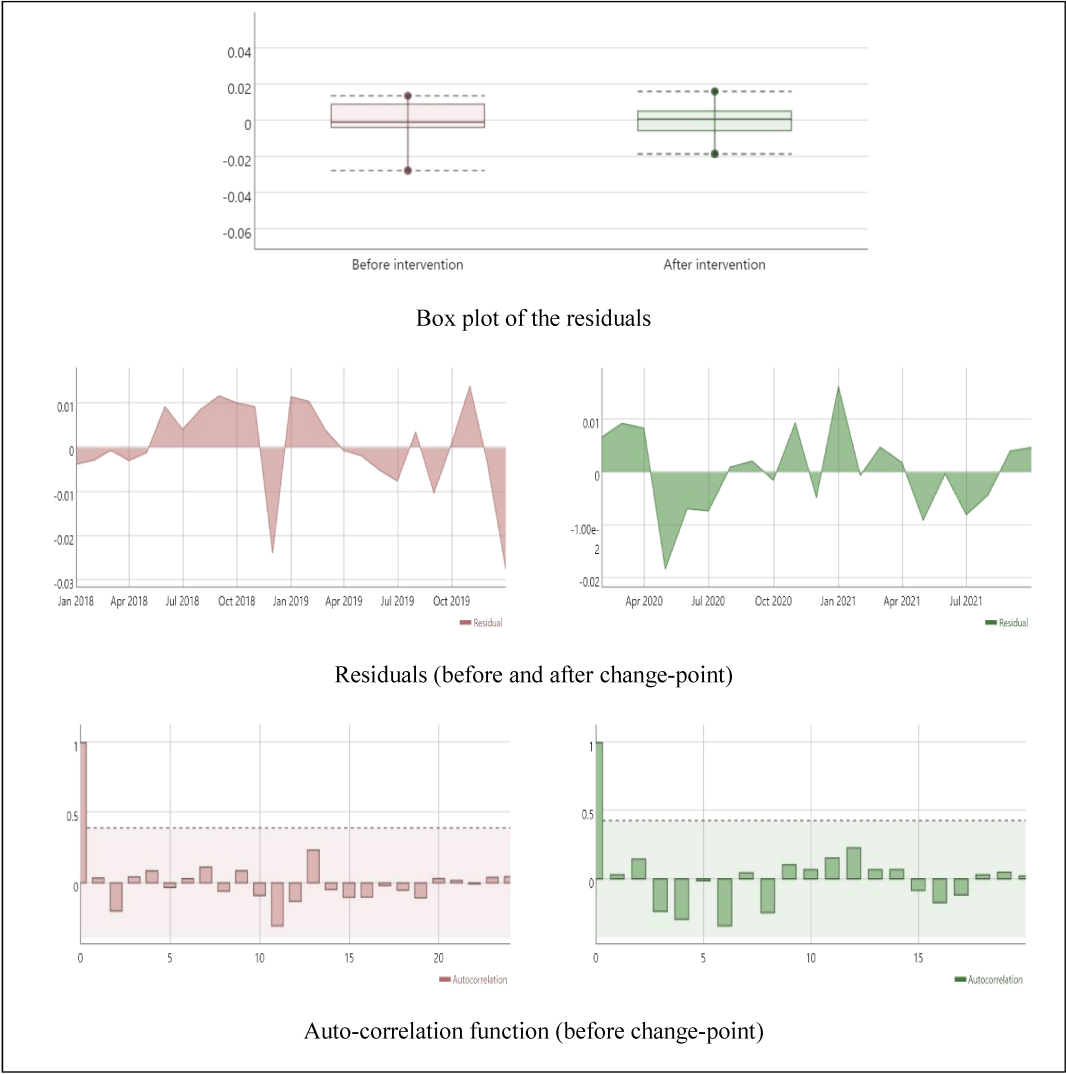

**Plots 2:** CMI mean in tertiary institutions

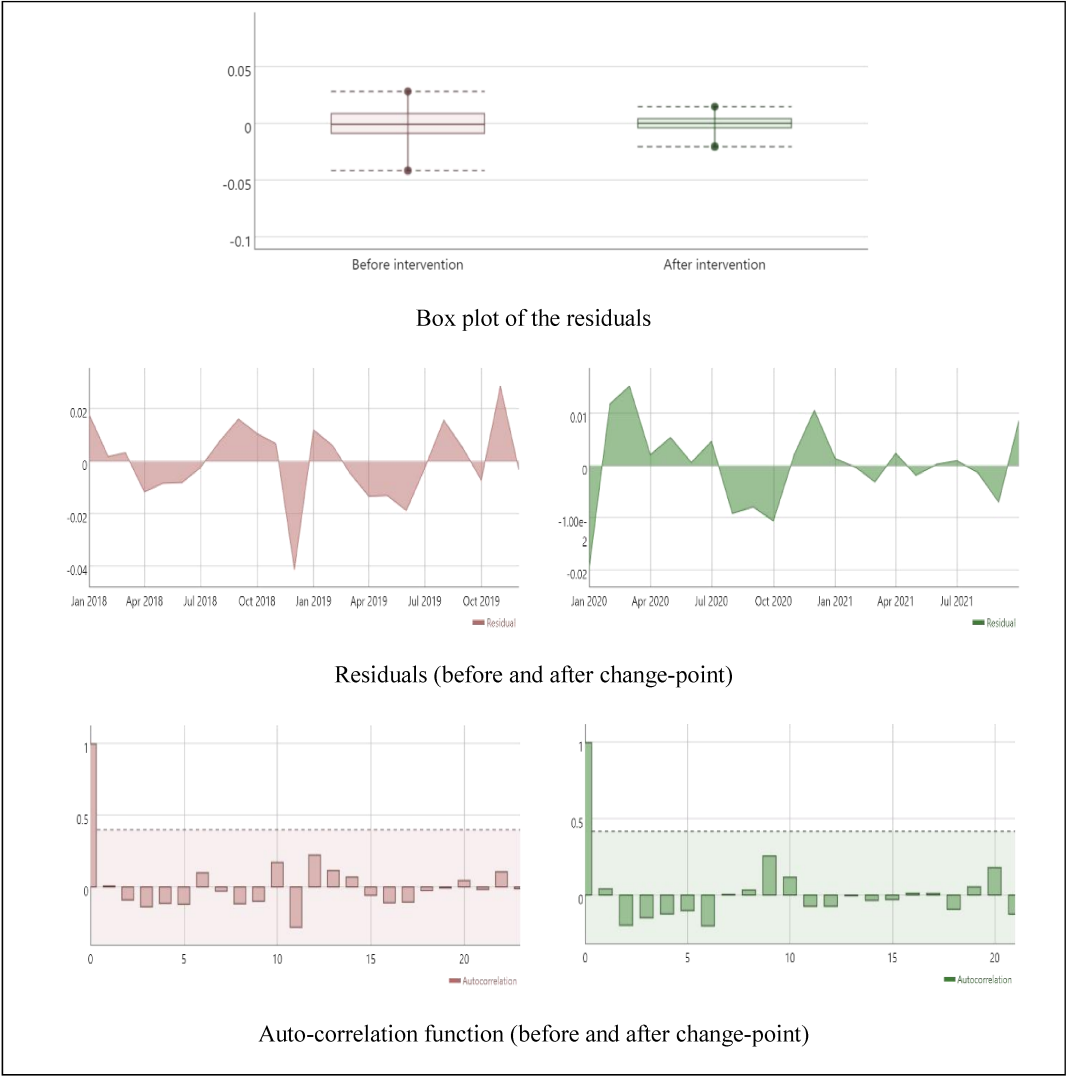

17 **Plots 3: CMI mean in secondary institutions**

18

19

20

21

22

23

24

25

26     **Appendix 2:** Cost per hospitalization (CPH) mean

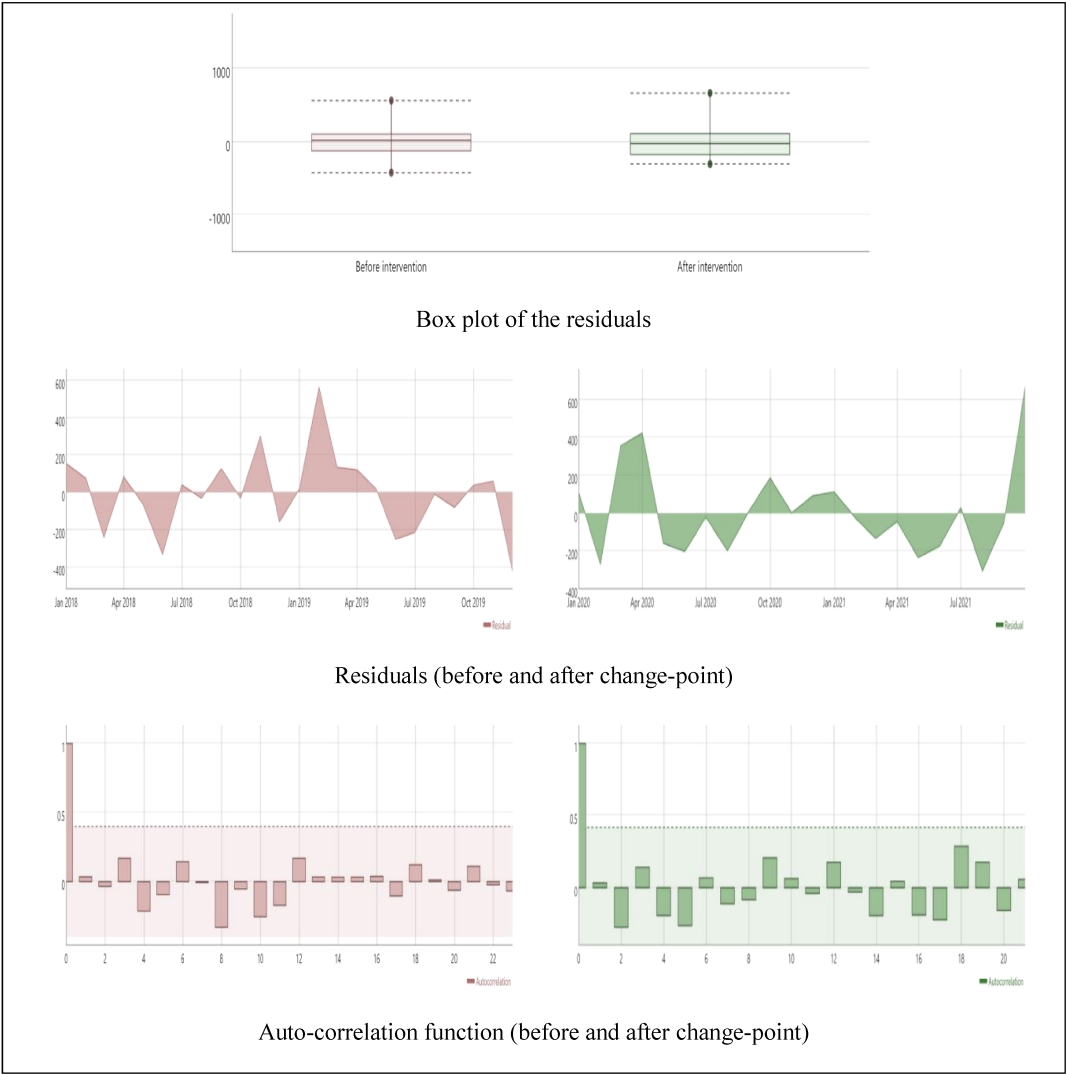

27     **Plots 1:** CPH mean in total institutions

28

29

30

31

32



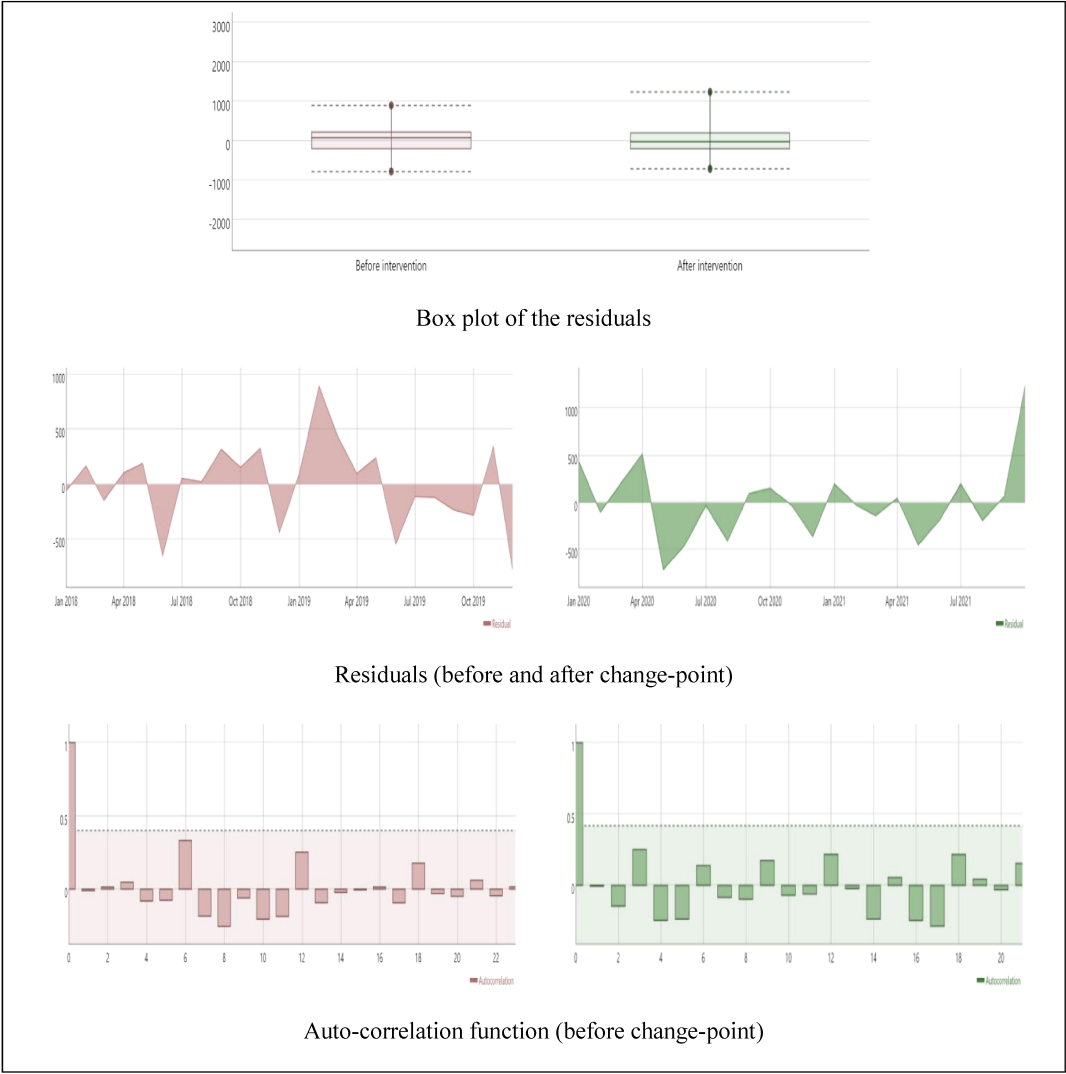

33 **Plots 2:** CPH mean in tertiary institutions

34  
35  
36  
37  
38  
39  
40

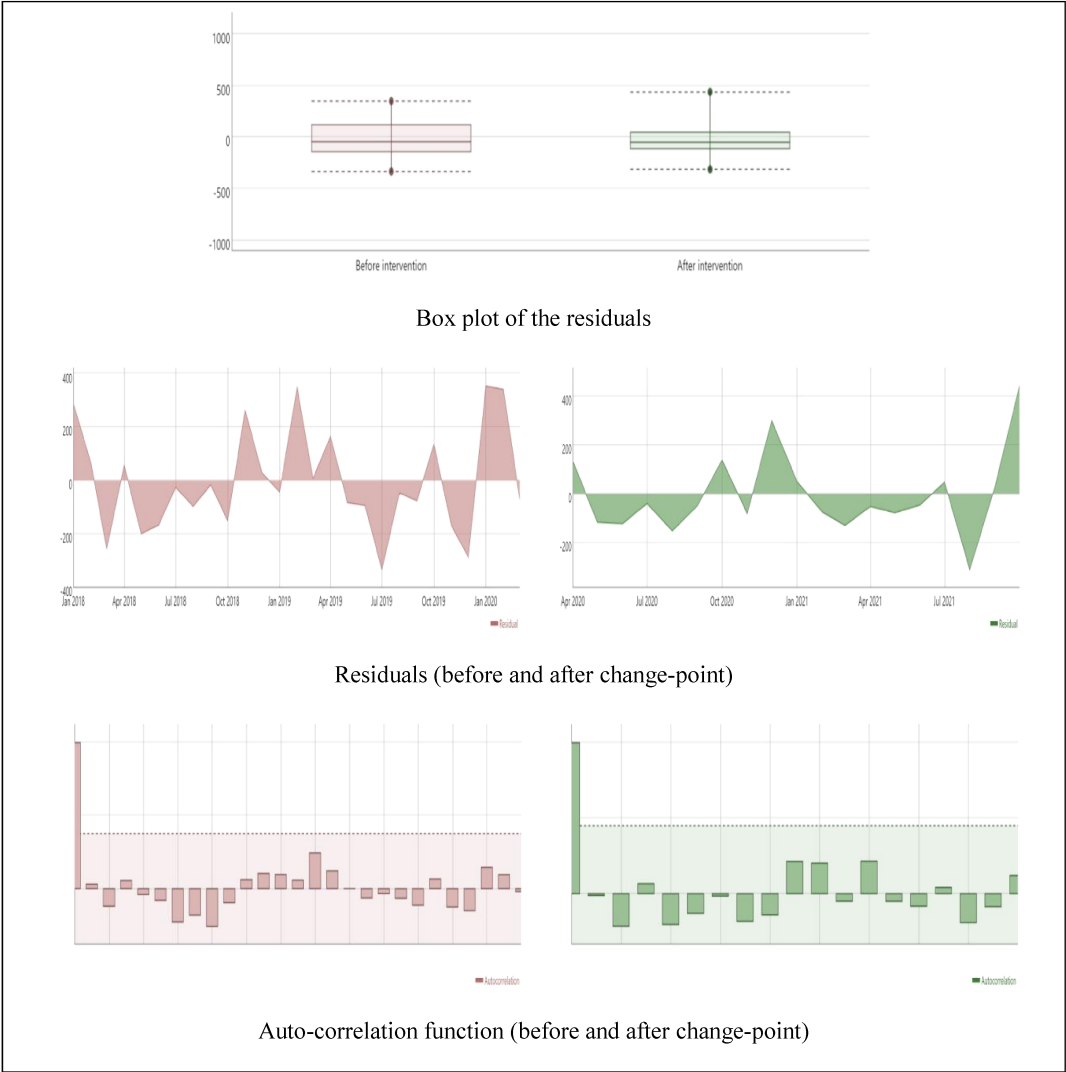

41 **Plots 3:** CPH mean in secondary institutions

42

43

44

45

46

47

48

49

50

51     **Appendix 3: Cost efficiency index (CEI) mean**

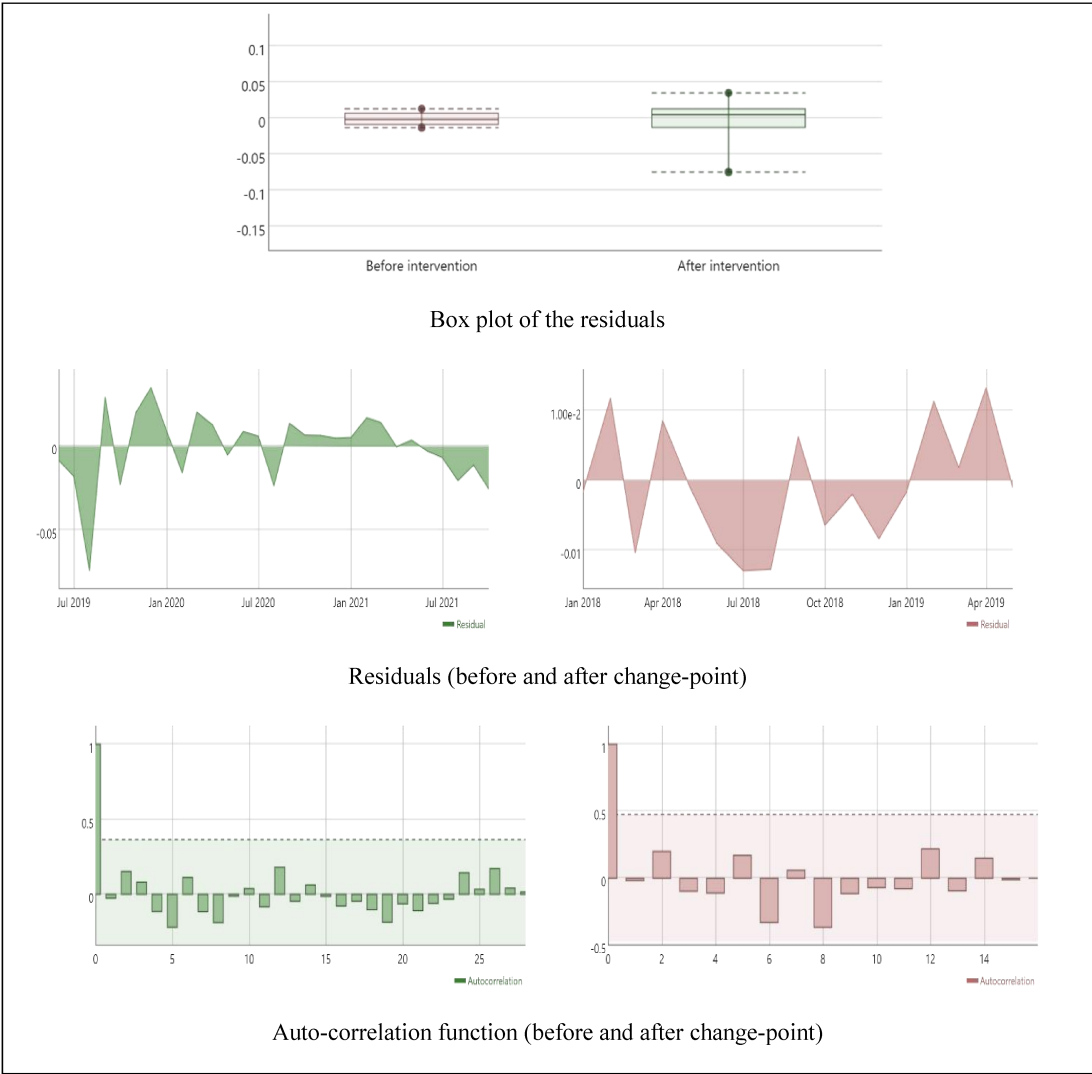

52     **Plots 1: CEI mean in total institutions**

53

54

55

56

57

58

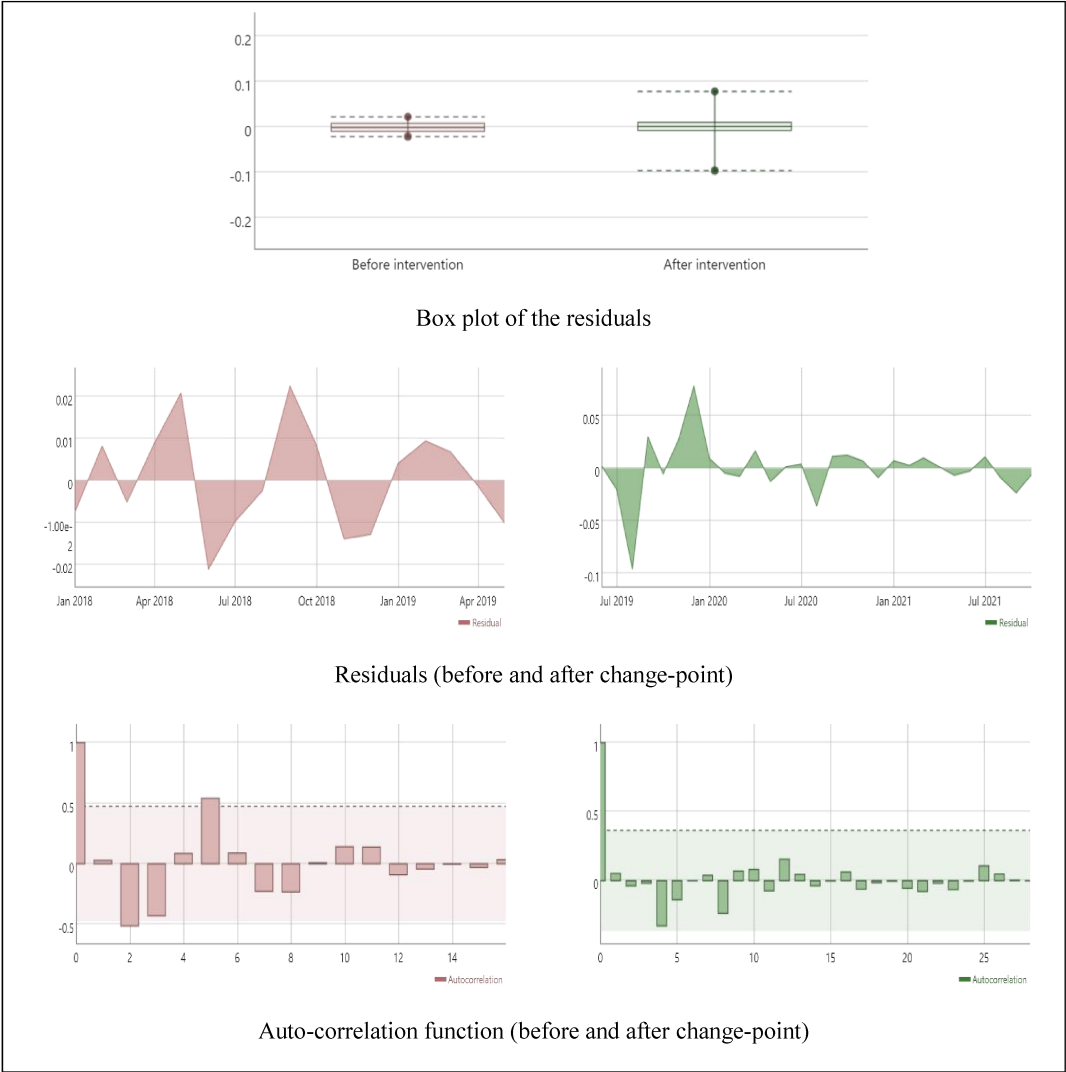

59 **Plots 2:** CEI mean in tertiary institutions

60

61

62

63

64

65

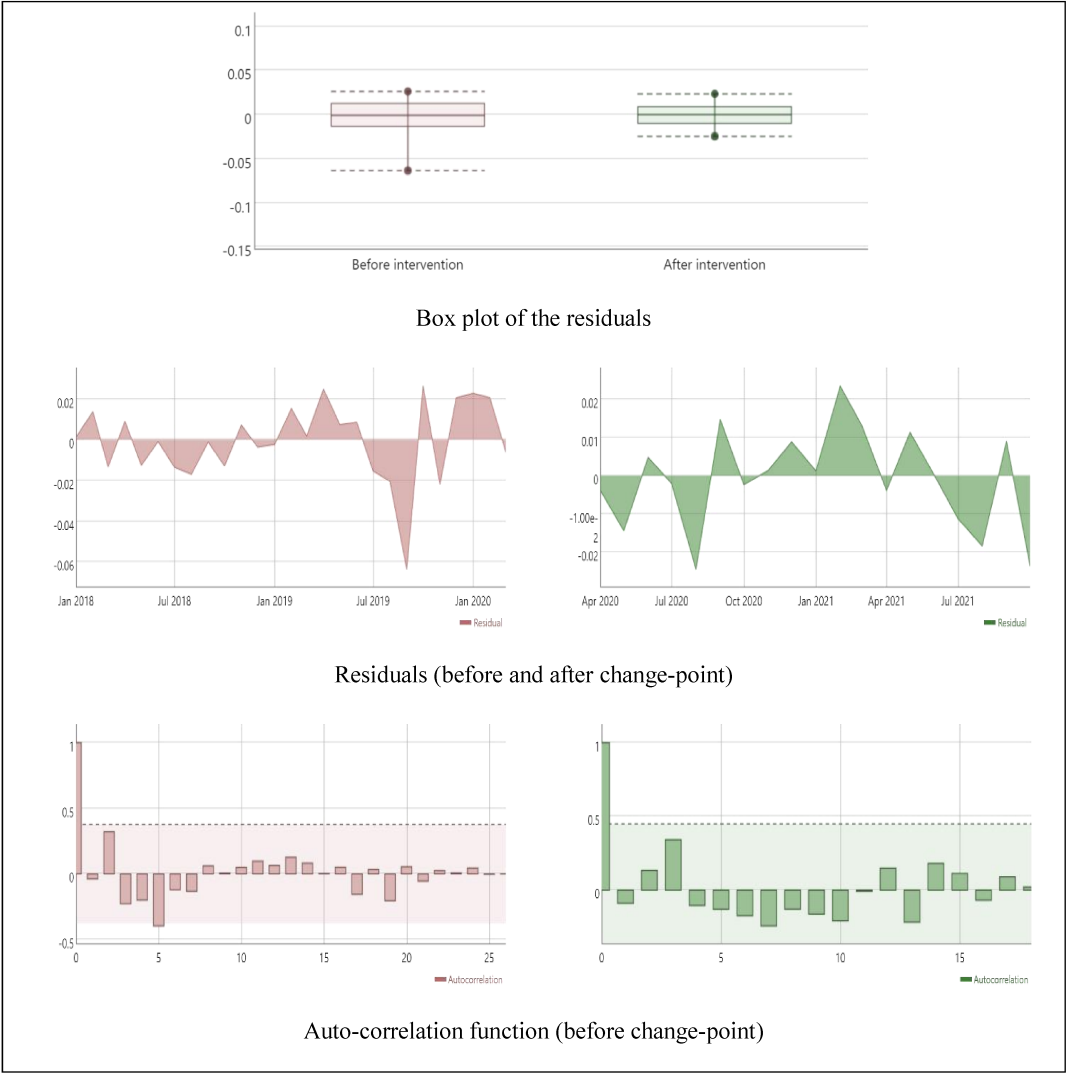

66 **Plots 3:** CEI mean in secondary institutions

67

68

69

70

71

72

73

74     **Appendix 4: Average length of stay (ALOS) mean**

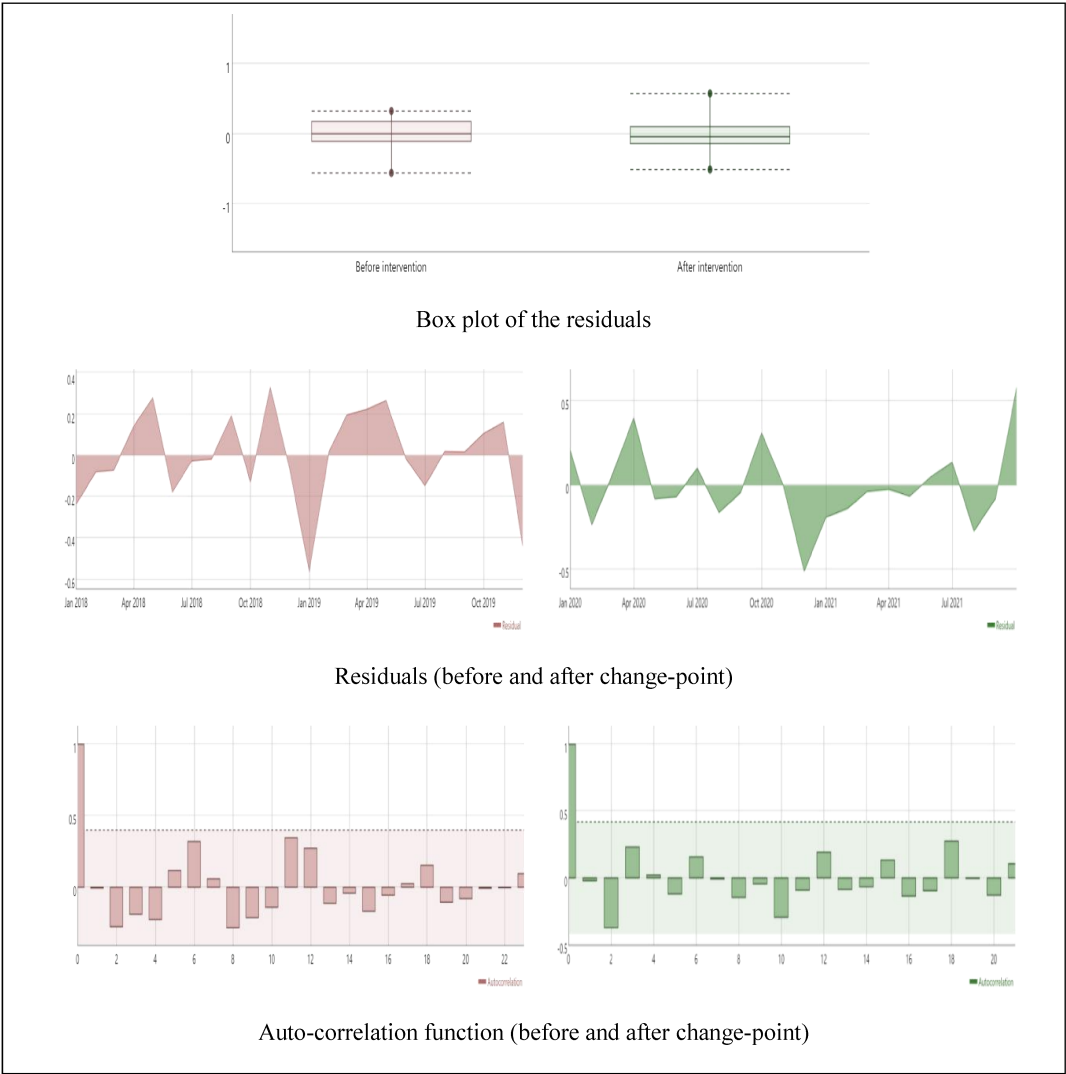

75     **Plots 1: ALOS mean in total institutions**

76

77

78

79

80

81

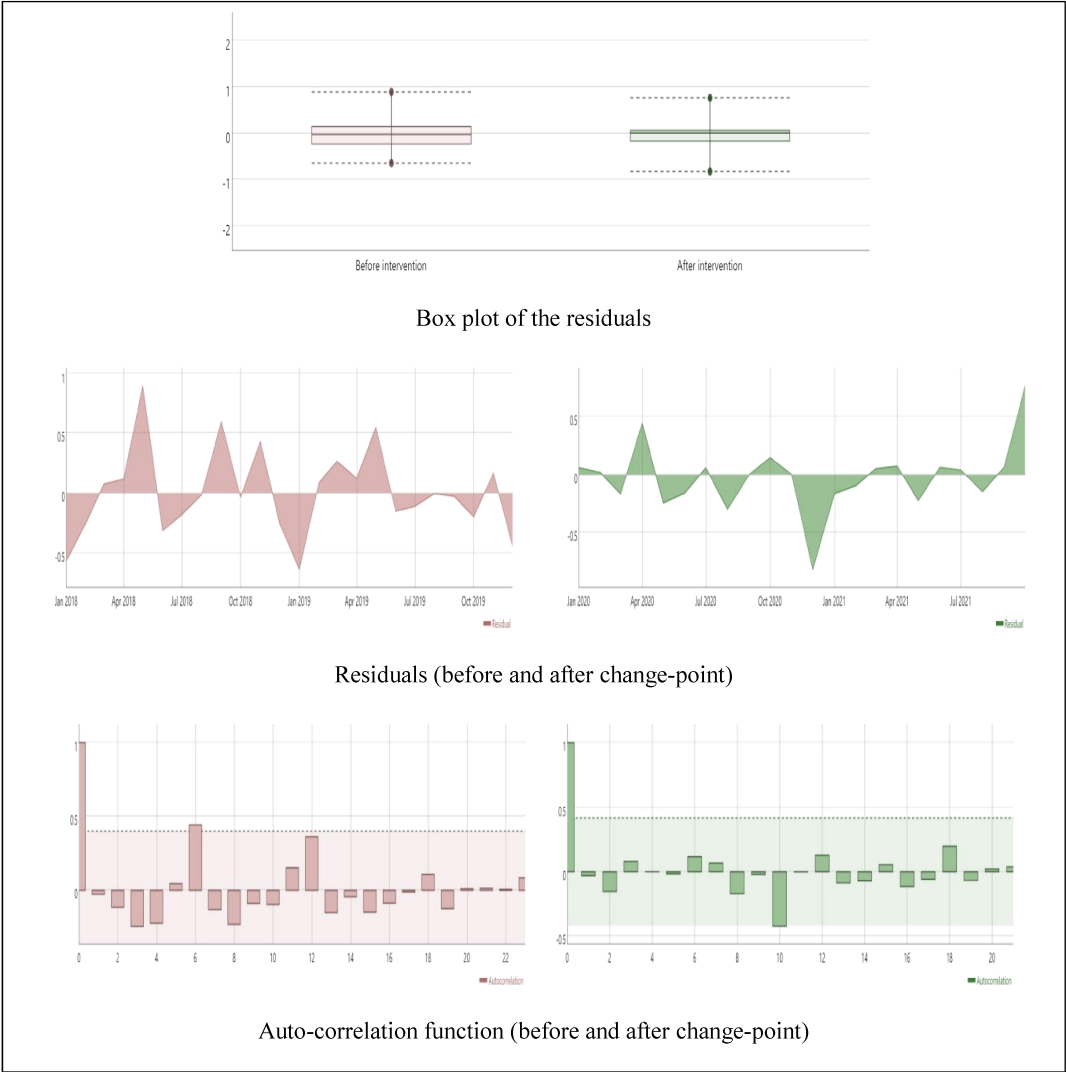

82 **Plots 2:** ALOS mean in tertiary institutions

83

84

85

86

87

88

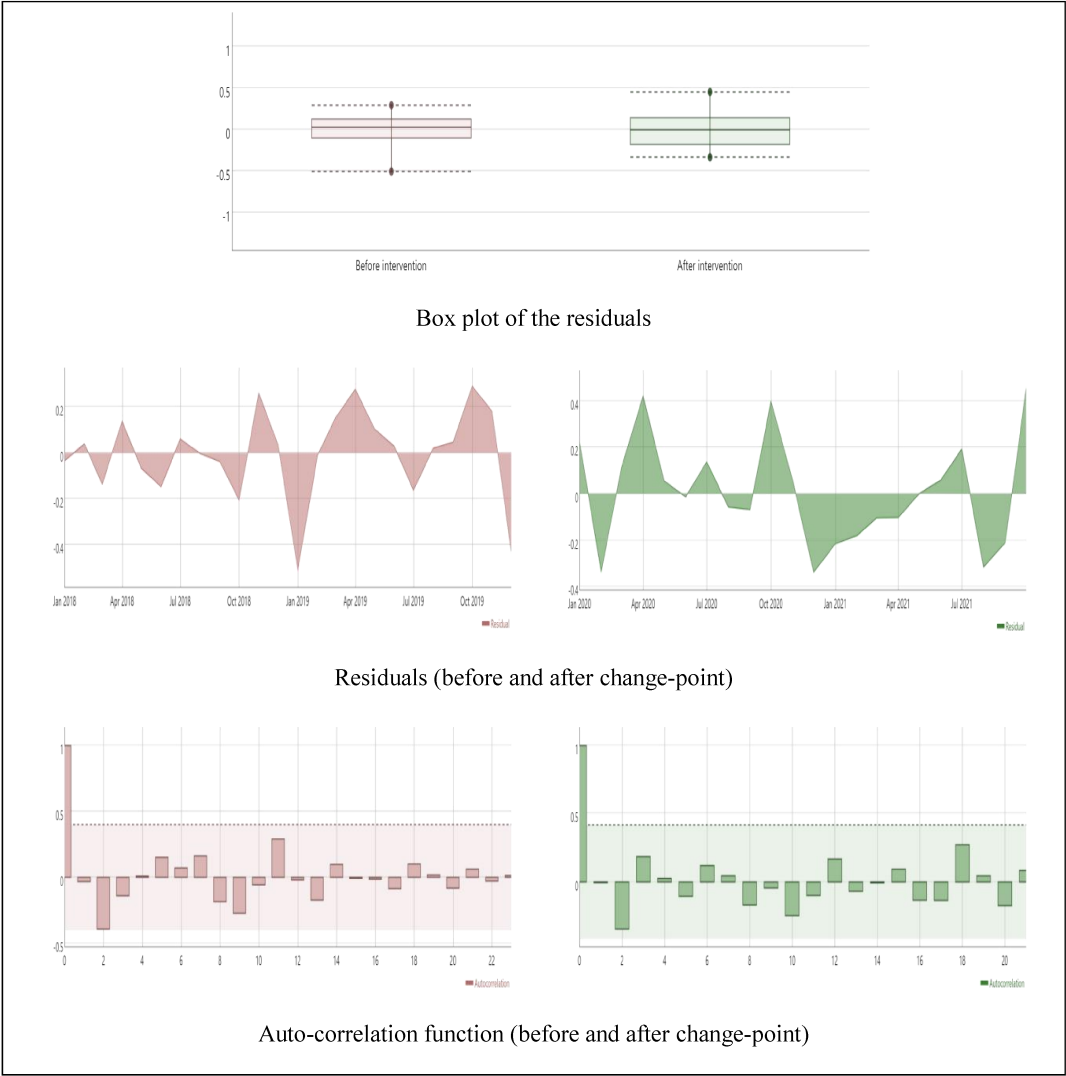

89 **Plots 3:** ALOS mean in secondary institutions

90

91

92

93

94

95



96     **Appendix 5:** Time efficiency index (TEI) mean

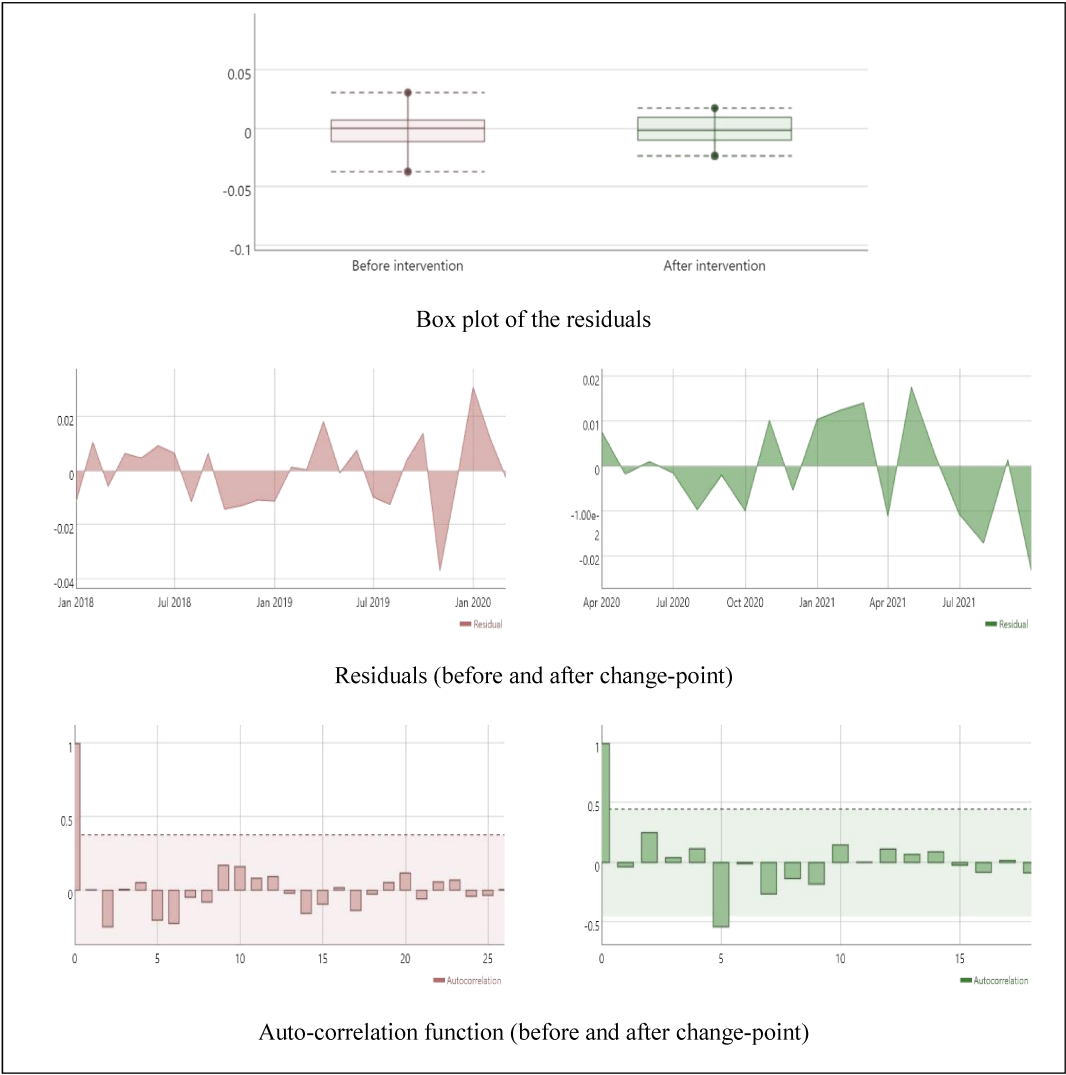

97     **Plots 1:** TEI mean in total institutions

98  
99  
100  
101  
102  
103

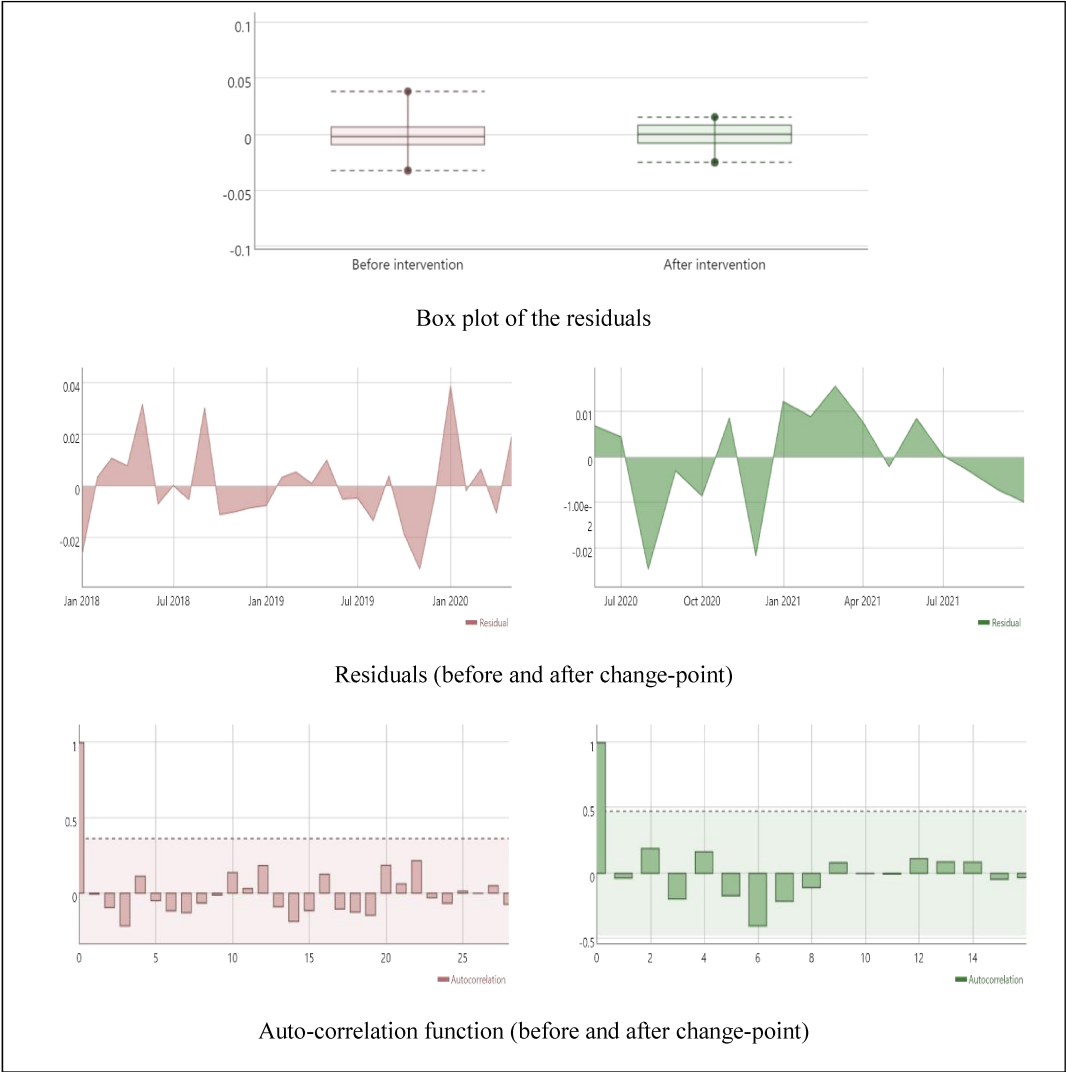

**Plots 2:** TEI mean in tertiary institutions

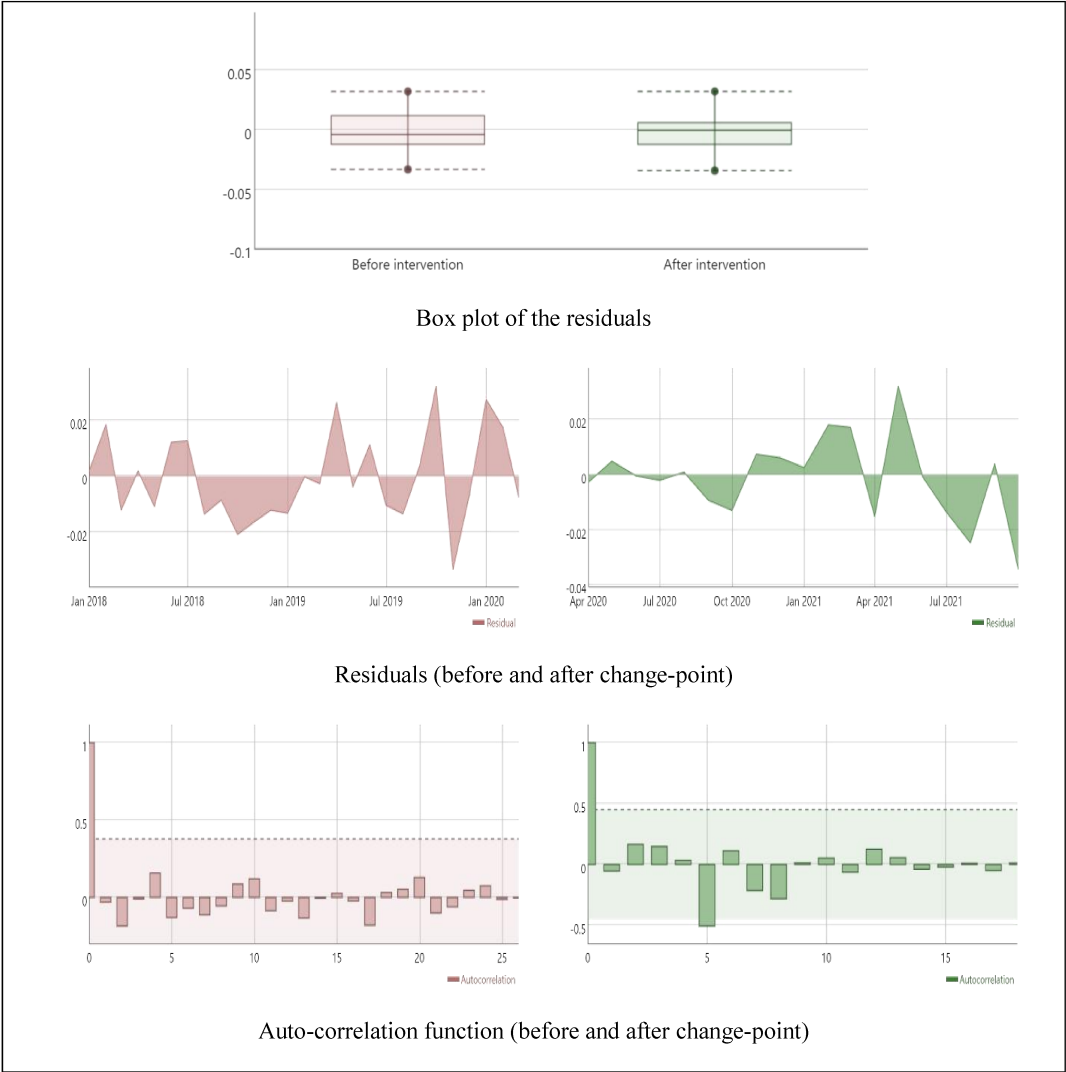

113 **Plots 3:** TEI mean in secondary institutions

114

115

116
